# Supplementary material
Source: publisher figshare collection journal article supplement (https://tandf.figshare.com/ndownloader/files/42773056)
Supplement: Supplementary file 1 [file 42773056]

**Supplementary Materials for “Mapping thermokarst lakes in different physical states on the central Tibetan Plateau”**

- **5.2 Robustness of the proposed methods**

**5.2.2 Adapt to map lakes at a regional scale**


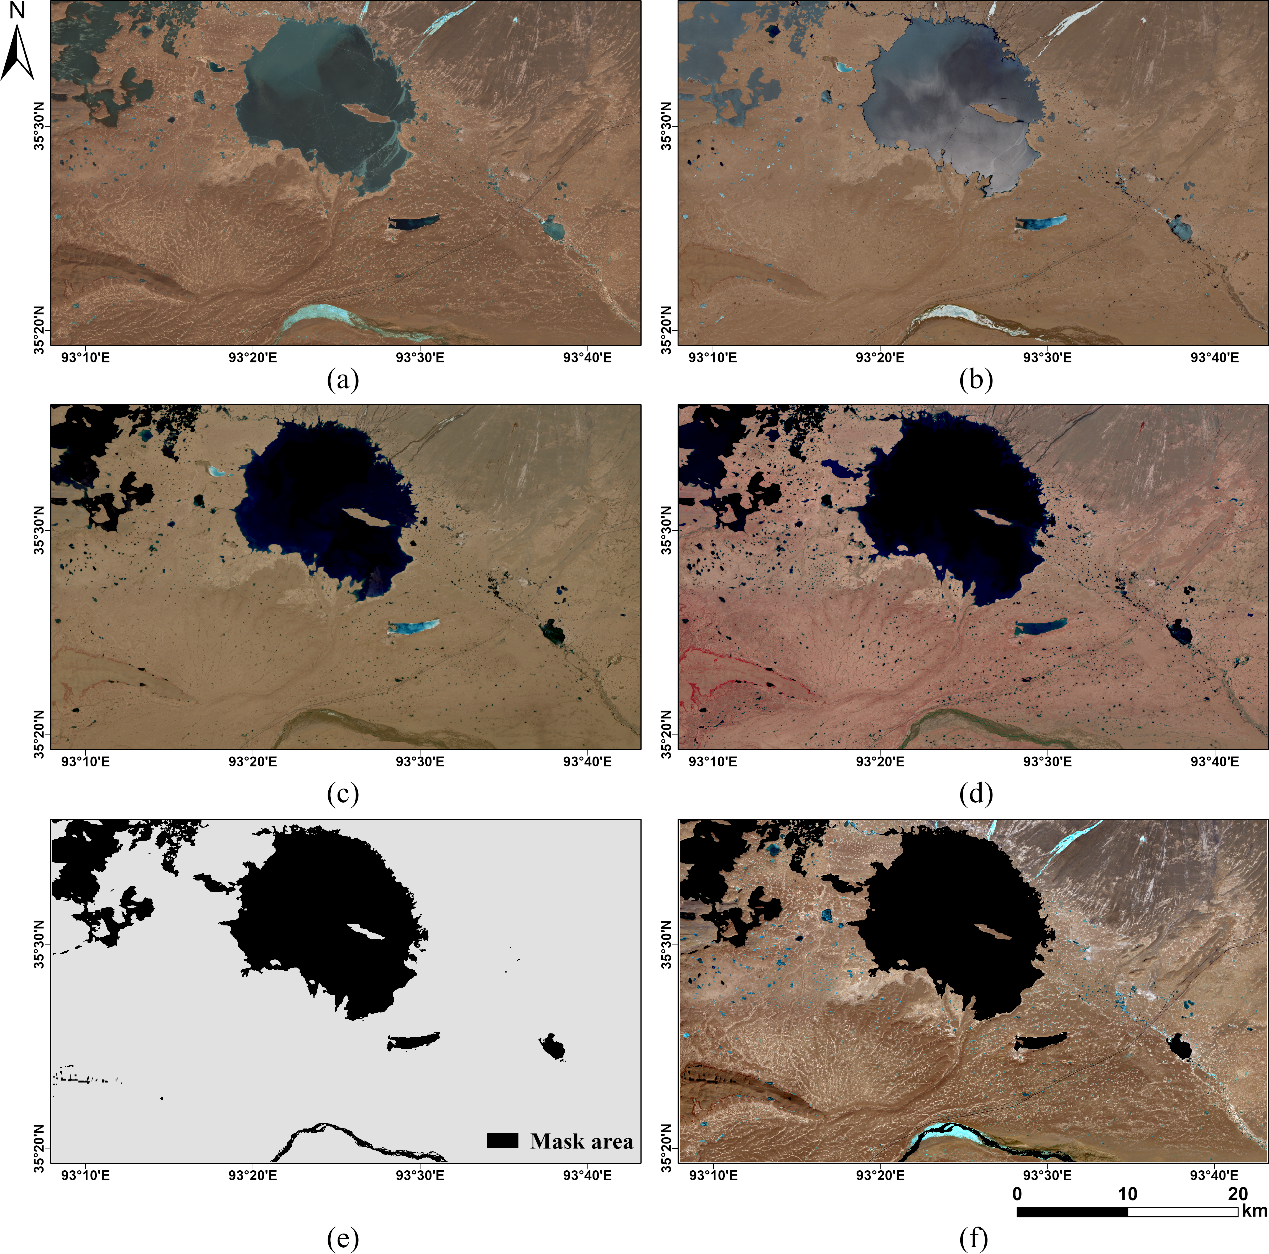


Fig. S1 Location of the study site on the northern bank of the Chumarhe River and datasets. The Sentinel-2 image was acquired on (a) January 22, (b) April 27, (c) June 1, 2018 and (d) August 15, 2019, corresponding to the ice, ice-water mixture, low water level and high water level periods of thermokarst lakes, respectively. Sentinel-2 images are composed by the NIR, Red, and Green bands. (e) is the mask composed of rivers, mountain shadows and lakes with an area larger than 3 km2. (f) is the masked Sentinel-2 image acquired on January 22, 2018.


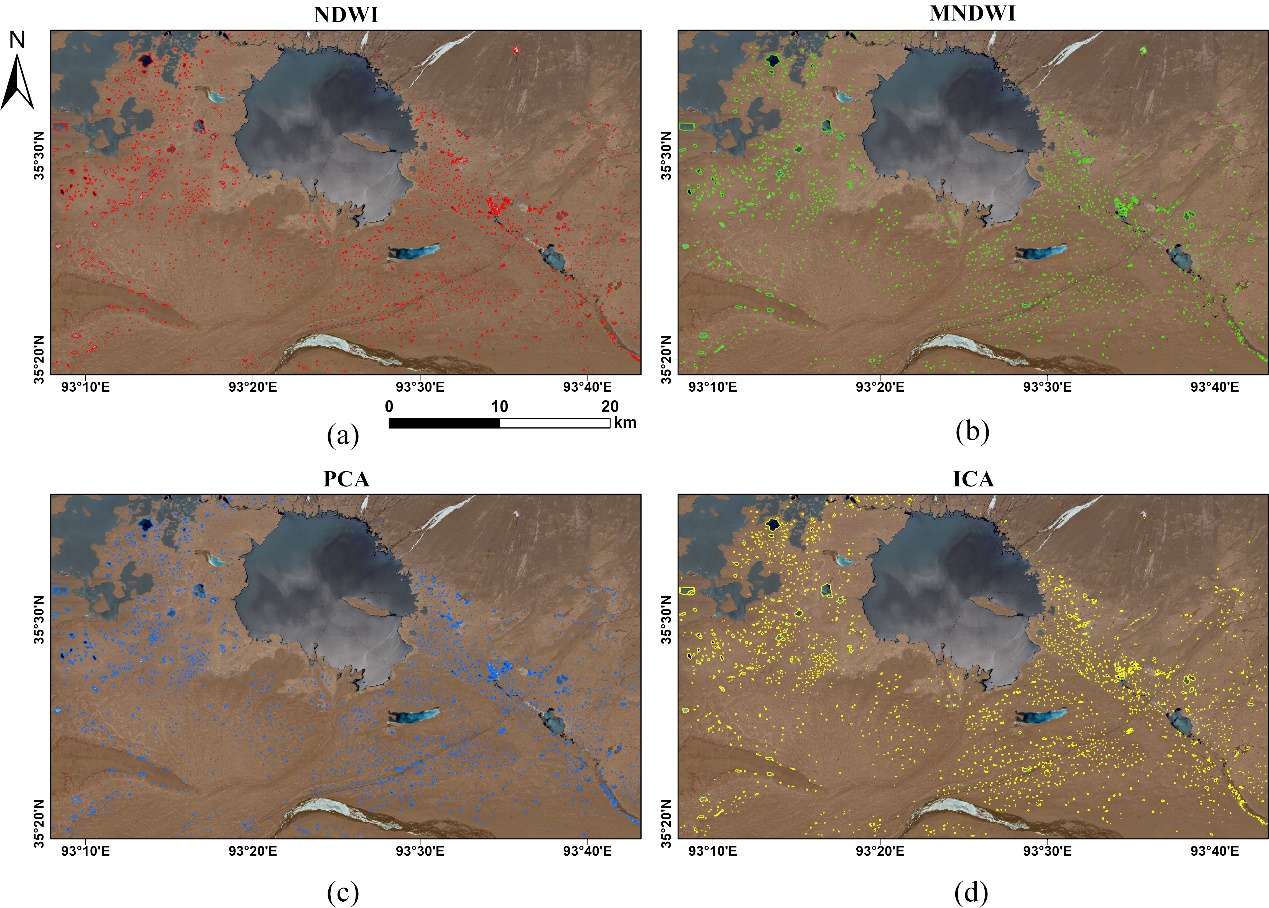


Fig. S2 Thermokarst lake mapping results on the northern bank of the Chumarhe River in ice-water mixture period. (a)–(d) Automatic results of NDWI-, MNDWI-, PCA-, and ICA-based MRF methods superimposed on the Sentinel-2 images acquired on April 27, 2018.


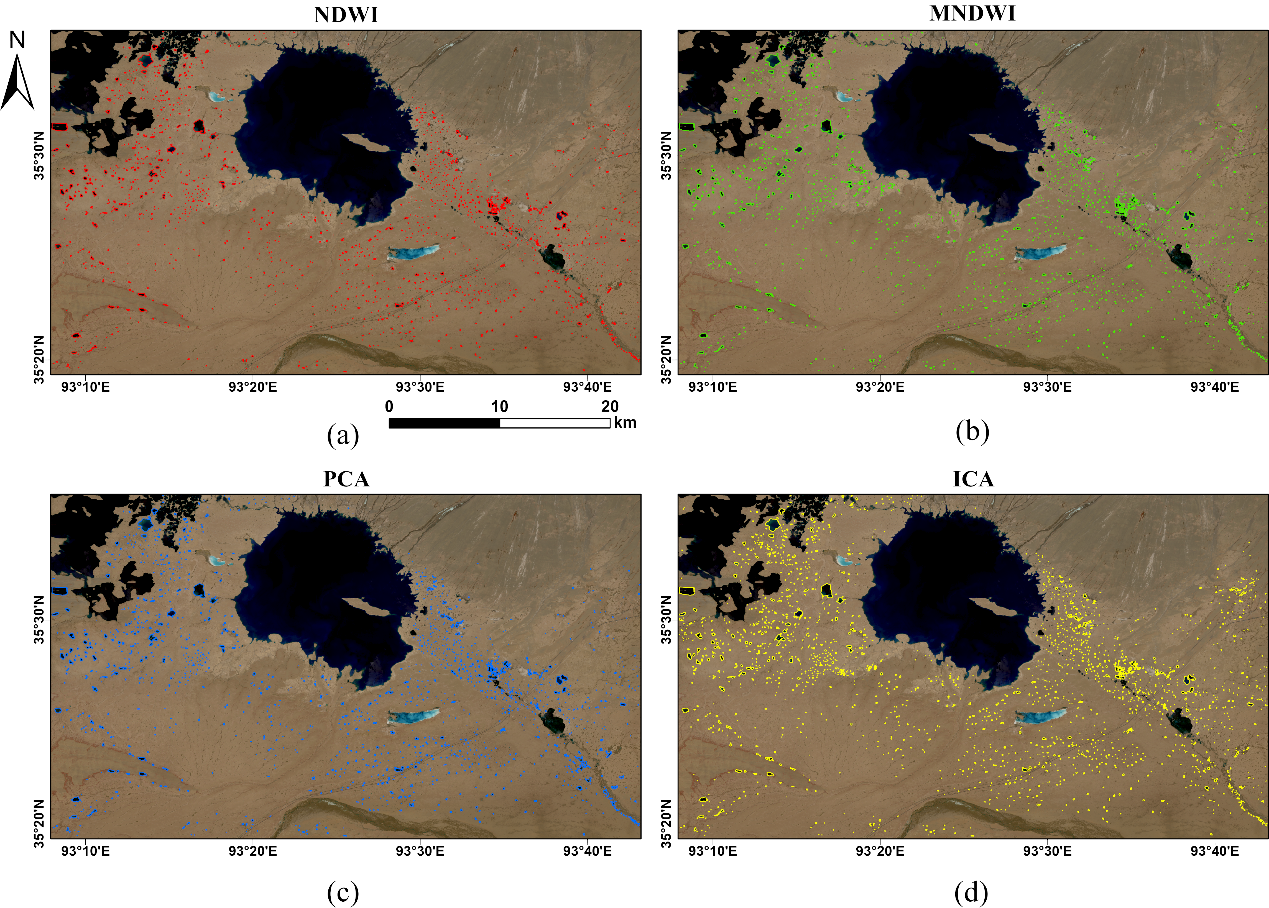


Fig. S3 Thermokarst lake mapping results on the northern bank of the Chumarhe River in low water level period. (a)–(d) Automatic results of NDWI-, MNDWI-, PCA-, and ICA-based MRF methods superimposed on the Sentinel-2 images acquired on June 1, 2018.


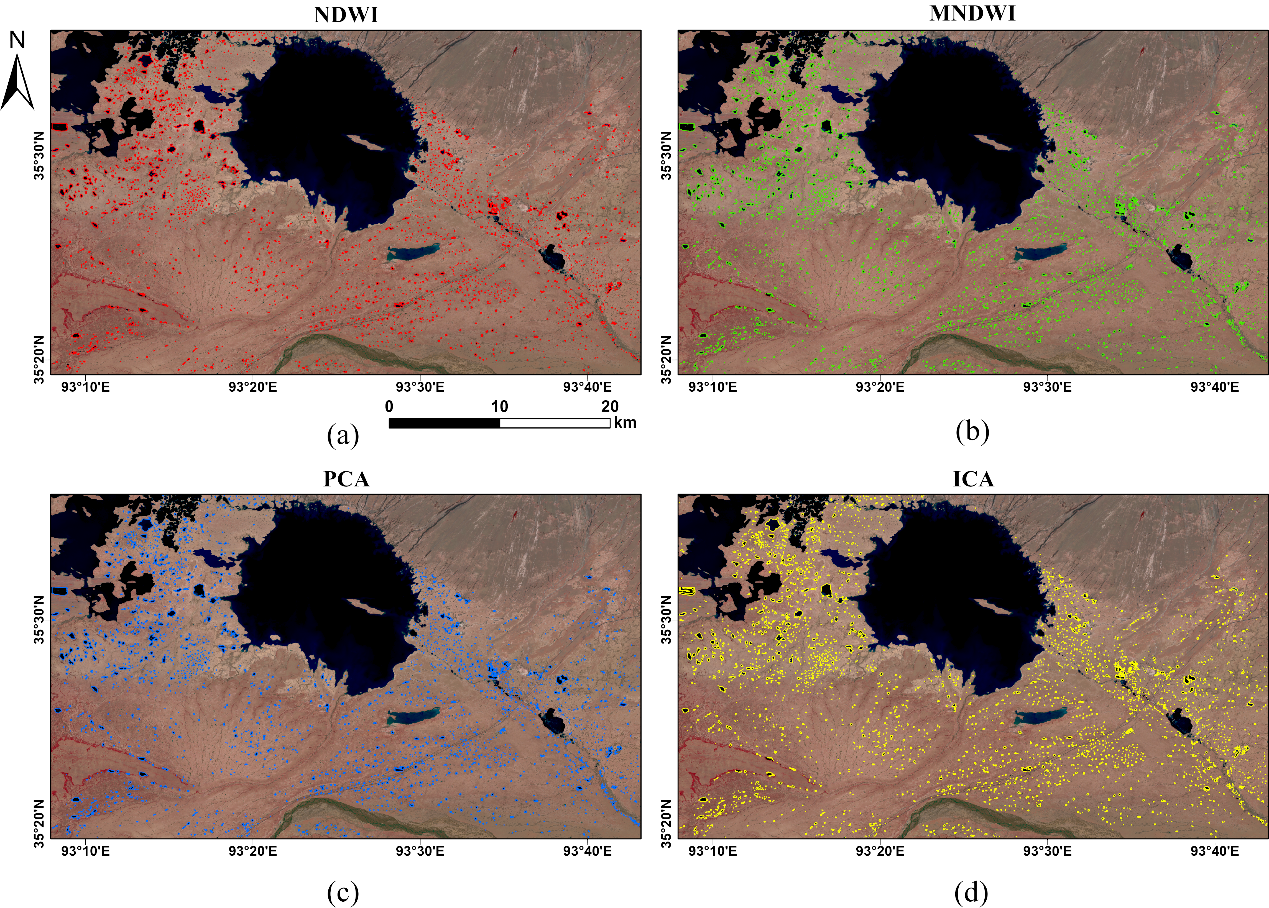


Fig. S4 Thermokarst lake mapping results on the northern bank of the Chumarhe River in high water level period. (a)–(d) Automatic results of NDWI-, MNDWI-, PCA-, and ICA-based MRF methods superimposed on the Sentinel-2 images acquired on August 15, 2019.
